# Supplementary material for: Designing promising ultraviolet (UV) birefringent crystals with different hydrogen-bonded phosphate frameworks
Source: Royal Society of Chemistry journal article supplement (doi:10.1039/d4qi01220h), 2024-01-01
Supplement: d4qi01220h1.pdf [file d4qi01220h1.pdf]

**Designing promising ultraviolet (UV) birefringent crystals with different hydrogen-bonded phosphate frameworks**

Miao-Bin Xu<sup>a</sup>, Jin Chen<sup>a,b\*</sup>, Huai-Yu Wu,<sup>a</sup> Jia-Jia Li,<sup>a</sup> Ning Yu,<sup>a</sup> Mo-Fan Zhuo,<sup>a</sup> Fei-Fei Mao<sup>b,c\*</sup> and Ke-Zhao Du<sup>a</sup>

<sup>a</sup> College of Chemistry and Materials Science, Fujian Key Laboratory of Polymer Materials, Fujian Normal University, Fuzhou, 350002, China

<sup>b</sup> State Key Laboratory of Structural Chemistry, Fujian Institute of Research on the Structure of Matter, Chinese Academy of Sciences, Fuzhou, 350002, P. R. China

<sup>c</sup> College of Science, Nanjing Agricultural University, Nanjing 210095, P. R. China

**Table S1.** Crystallographic data for **I** and **II**.

| Compound                                                                                 | <b>I</b>                                                      | <b>II</b>                                       |
|------------------------------------------------------------------------------------------|---------------------------------------------------------------|-------------------------------------------------|
| empirical formula                                                                        | C <sub>6</sub> H <sub>9</sub> N <sub>2</sub> O <sub>5</sub> P | C <sub>6</sub> H <sub>8</sub> NO <sub>6</sub> P |
| formula weight                                                                           | 220.12                                                        | 221.10                                          |
| crystal system                                                                           | orthorhombic                                                  | orthorhombic                                    |
| space group                                                                              | <i>Fdd2</i>                                                   | <i>Pbca</i>                                     |
| T (K)                                                                                    | 299.73(10)                                                    | 293(2)                                          |
| <i>a</i> (Å)                                                                             | 35.3496(12)                                                   | 12.9290(2)                                      |
| <i>b</i> (Å)                                                                             | 14.3166(5)                                                    | 7.69510(10)                                     |
| <i>c</i> (Å)                                                                             | 7.1073(2)                                                     | 17.0913(3)                                      |
| <i>V</i> (Å <sup>3</sup> )                                                               | 3596.9(2)                                                     | 1700.41(5)                                      |
| <i>Z</i>                                                                                 | 16                                                            | 8                                               |
| <i>D<sub>c</sub></i> (g/cm <sup>3</sup> )                                                | 1.626                                                         | 1.727                                           |
| $\mu$ (mm <sup>-1</sup> )                                                                | 2.799                                                         | 3.021                                           |
| goodness of fit on <i>F</i> <sup>2</sup>                                                 | 1.060                                                         | 1.162                                           |
| Flack parameter                                                                          | 0.02(3)                                                       | none                                            |
| <i>R</i> <sub>1</sub> , <i>wR</i> <sub>2</sub> [ <i>I</i> > 2σ( <i>I</i> )] <sup>a</sup> | 0.0276, 0.0692                                                | 0.0453, 0.1021                                  |
| <i>R</i> <sub>1</sub> , <i>wR</i> <sub>2</sub> (all data) <sup>a</sup>                   | 0.0295, 0.0701                                                | 0.0500, 0.1082                                  |

$$^a R_1 = \sum ||F_o| - |F_c|| / \sum |F_o|, \text{ and } wR_2 = \{\sum w[(F_o)^2 - (F_c)^2]^2 / \sum w[(F_o)^2]^2\}^{1/2}$$

**Table S2.** Fractional Atomic Coordinates ( $\times 10^4$ ) and Equivalent Isotropic Displacement Parameters (Å<sup>2</sup> $\times 10^3$ ) for **I**.

| Atom | x         | y          | z         | U(eq)     |
|------|-----------|------------|-----------|-----------|
| P1   | 3487.7(2) | 3847.4(4)  | 2684.9(7) | 34.86(18) |
| O1   | 5129.3(5) | 3810.8(19) | 2712(3)   | 59.5(6)   |
| O2   | 3588.8(5) | 4316.7(16) | 4514(3)   | 44.2(4)   |
| O3   | 3349.5(6) | 4489.4(15) | 1175(3)   | 47.5(5)   |
| O4   | 3178.4(6) | 3079.0(14) | 3061(3)   | 50.2(5)   |
| O5   | 3828.6(6) | 3286.4(17) | 1872(3)   | 48.9(5)   |
| N1   | 4228.0(6) | 4007.1(16) | 6178(3)   | 37.8(5)   |
| N2   | 5547.4(6) | 3538(2)    | 5037(4)   | 48.0(6)   |
| C1   | 5203.0(8) | 3699(2)    | 4395(4)   | 41.4(6)   |
| C2   | 4882.6(7) | 3757.0(18) | 5773(3)   | 35.7(5)   |
| C3   | 4529.6(7) | 3956.4(18) | 5054(4)   | 37.1(5)   |
| C4   | 4255.3(8) | 3866(2)    | 8030(4)   | 41.7(6)   |
| C5   | 4599.9(9) | 3676(2)    | 8828(4)   | 47.5(7)   |
| C6   | 4916.0(7) | 3619.2(19) | 7698(4)   | 41.9(6)   |

**Table S3.** Fractional Atomic Coordinates ( $\times 10^4$ ) and Equivalent Isotropic Displacement Parameters ( $\text{\AA}^2 \times 10^3$ ) for **II**.

| Atom | x          | y          | z          | U(eq)     |
|------|------------|------------|------------|-----------|
| P1   | 6318.8(4)  | 11615.3(7) | 4778.4(3)  | 23.56(18) |
| O1   | 6357.7(12) | 9660(2)    | 4812.9(10) | 30.2(4)   |
| O2   | 6323.5(14) | 12336(2)   | 3958.5(10) | 33.7(4)   |
| O3   | 7218.3(14) | 12417(3)   | 5266.0(10) | 39.6(5)   |
| O4   | 5351.0(14) | 12281(2)   | 5234.9(12) | 41.0(5)   |
| O5   | 6379.1(15) | 5479(2)    | 3562.6(11) | 38.2(4)   |
| O6   | 6212.1(16) | 4251(2)    | 2388.0(11) | 43.5(5)   |
| N1   | 6267.2(15) | 10337(3)   | 2629.0(12) | 31.0(4)   |
| C1   | 6280.0(17) | 5518(3)    | 2805.9(14) | 28.9(5)   |
| C2   | 6250.7(16) | 7313(3)    | 2468.5(14) | 26.8(5)   |
| C3   | 6163.5(18) | 7547(3)    | 1666.2(14) | 31.2(5)   |
| C4   | 6133(2)    | 9203(3)    | 1358.3(15) | 35.6(6)   |
| C5   | 6187.2(19) | 10600(3)   | 1853.9(15) | 34.0(5)   |
| C6   | 6298.0(17) | 8753(3)    | 2947.2(14) | 29.6(5)   |

**Table S4.** Bond Lengths for **I**.

| Atom | Atom | Length/ $\text{\AA}$ | Atom | Atom | Length/ $\text{\AA}$ |
|------|------|----------------------|------|------|----------------------|
| P1   | O2   | 1.506(2)             | N2   | C1   | 1.320(4)             |
| P1   | O3   | 1.495(2)             | C1   | C2   | 1.500(4)             |
| P1   | O4   | 1.574(2)             | C2   | C3   | 1.378(3)             |
| P1   | O5   | 1.559(2)             | C2   | C6   | 1.388(4)             |
| O1   | C1   | 1.235(4)             | C4   | C5   | 1.371(4)             |
| N1   | C3   | 1.334(3)             | C5   | C6   | 1.378(4)             |
| N1   | C4   | 1.335(4)             |      |      |                      |

**Table S5.** Bond Lengths for **II**.

| Atom | Atom | Length/ $\text{\AA}$ | Atom | Atom | Length/ $\text{\AA}$ |
|------|------|----------------------|------|------|----------------------|
| P1   | O1   | 1.5065(17)           | N1   | C6   | 1.336(3)             |
| P1   | O2   | 1.5070(17)           | C1   | C2   | 1.497(3)             |
| P1   | O3   | 1.5581(17)           | C2   | C3   | 1.388(3)             |
| P1   | O4   | 1.5611(18)           | C2   | C6   | 1.379(3)             |
| O5   | C1   | 1.300(3)             | C3   | C4   | 1.379(3)             |
| O6   | C1   | 1.212(3)             | C4   | C5   | 1.371(4)             |
| N1   | C5   | 1.344(3)             |      |      |                      |

**Table S6.** Bond Angles for **I**.

| Atom | Atom | Atom | Angle/     | Atom | Atom | Atom | Angle/   |
|------|------|------|------------|------|------|------|----------|
| O2   | P1   | O4   | 109.27(12) | N2   | C1   | C2   | 118.7(3) |
| O2   | P1   | O5   | 111.47(12) | C3   | C2   | C1   | 116.9(2) |
| O3   | P1   | O2   | 115.00(13) | C3   | C2   | C6   | 118.2(2) |
| O3   | P1   | O4   | 108.94(12) | C6   | C2   | C1   | 124.9(2) |
| O3   | P1   | O5   | 107.66(12) | N1   | C3   | C2   | 120.8(2) |
| O5   | P1   | O4   | 103.88(13) | N1   | C4   | C5   | 120.1(3) |
| C3   | N1   | C4   | 121.6(2)   | C4   | C5   | C6   | 119.4(3) |
| O1   | C1   | N2   | 123.5(3)   | C5   | C6   | C2   | 119.8(2) |
| O1   | C1   | C2   | 117.8(2)   |      |      |      |          |

**Table S7.** Bond Angles for **II**.

| Atom | Atom | Atom | Angle/°    | Atom | Atom | Atom | Angle/°  |
|------|------|------|------------|------|------|------|----------|
| O1   | P1   | O2   | 113.80(10) | O6   | C1   | C2   | 120.9(2) |
| O1   | P1   | O3   | 110.47(10) | C3   | C2   | C1   | 120.2(2) |
| O1   | P1   | O4   | 109.57(10) | C6   | C2   | C1   | 120.8(2) |
| O2   | P1   | O3   | 110.41(10) | C6   | C2   | C3   | 119.0(2) |
| O2   | P1   | O4   | 110.32(11) | C4   | C3   | C2   | 120.0(2) |
| O3   | P1   | O4   | 101.59(11) | C5   | C4   | C3   | 119.2(2) |
| C6   | N1   | C5   | 122.8(2)   | N1   | C5   | C4   | 119.7(2) |
| O5   | C1   | C2   | 114.0(2)   | N1   | C6   | C2   | 119.4(2) |
| O6   | C1   | O5   | 125.0(2)   |      |      |      |          |

**Table S8.** Hydrogen Bonds for **I**.

| D  | H   | A               | d(D-H)/Å | d(H-A)/Å | d(D-A)/Å | D-H-A/° |
|----|-----|-----------------|----------|----------|----------|---------|
| O4 | H4A | O1 <sup>1</sup> | 0.82     | 1.80     | 2.621(3) | 175.3   |
| O5 | H5A | O3 <sup>2</sup> | 0.82     | 1.74     | 2.527(3) | 160.7   |
| N1 | H1  | O2              | 0.86     | 1.73     | 2.589(3) | 173.6   |
| N2 | H2A | O2 <sup>3</sup> | 0.86     | 2.09     | 2.922(3) | 164.3   |
| N2 | H2B | O3 <sup>4</sup> | 0.86     | 2.08     | 2.898(3) | 157.9   |

<sup>1</sup> -1/4+X, 3/4-Y, 1/4+Z; <sup>2</sup> 3/4-X, -1/4+Y, 1/4+Z; <sup>3</sup> 1/4+X, 3/4-Y, -1/4+Z; <sup>4</sup> 1/4+X, 3/4-Y, 3/4+Z. Only the hydrogen bonds are selected with max D-A distance 3 Å and minimum angle 120°.

**Table S9.** Hydrogen Bonds for **II**.

| D  | H   | A               | d(D-H)/Å | d(H-A)/Å | d(D-A)/Å | D-H-A/° |
|----|-----|-----------------|----------|----------|----------|---------|
| O3 | H3A | O1 <sup>1</sup> | 0.82     | 1.88     | 2.640(2) | 152.7   |
| O4 | H4A | O1 <sup>2</sup> | 0.82     | 1.86     | 2.668(2) | 168.2   |
| O5 | H5  | O2 <sup>3</sup> | 0.86     | 1.79     | 2.513(2) | 139.7   |
| N1 | H1  | O2              | 0.86     | 1.95     | 2.745(3) | 153.1   |
| C5 | H5A | O6 <sup>4</sup> | 0.93     | 2.31     | 2.954(3) | 125.7   |

<sup>1</sup> 3/2-X, 1/2+Y, +Z; <sup>2</sup> 1-X, 2-Y, 1-Z; <sup>3</sup> +X, -1+Y, +Z; <sup>4</sup> +X, 1+Y, +Z. Only the hydrogen bonds are selected with max D-A distance 3 Å and minimum angle 120°.

**Table S10.** List of  $\pi$ - $\pi$  interactions for **I**.

| Cg(I)-Cg(J) | ARU(J) | Cg-Cg (Å)  | Alpha (°) | Beta (°) | Gamma (°) | CgI_Perp (Å) | CgJ_Perp (Å) |
|-------------|--------|------------|-----------|----------|-----------|--------------|--------------|
| Cg(1)-Cg(1) | a      | 4.5654(15) | 15.10(13) | 33.1     | 33.1      | 3.8223(11)   | 3.8223(11)   |

a: 1-X, 1-Y, Z; Cg(I) = Plane number I (= ring number in () above); Alpha = Dihedral Angle between Planes I and J (Deg); Beta = Angle Cg(I)-->Cg(J) or Cg(I)-->Me vector and normal to plane I (Deg); Gamma = Angle Cg(I)-->Cg(J) vector and normal to plane J (Deg); Cg-Cg = Distance between ring Centroids (Ang.); CgI\_Perp = Perpendicular distance of Cg(I) on ring J (Ang.); CgJ\_Perp = Perpendicular distance of Cg(J) on ring I (Ang.)

**Table S11.** List of  $\pi$ - $\pi$  interactions for **II**.

| Cg(I)-Cg(J) | ARU(J) | Cg-Cg (Å)  | Alpha (°) | Beta (°) | Gamma (°) | CgI_Perp (Å) | CgJ_Perp (Å) |
|-------------|--------|------------|-----------|----------|-----------|--------------|--------------|
| Cg(1)-Cg(1) | a      | 5.1088(13) | 0.12(11)  | 50.8     | 50.7      | 3.2334(9)    | 3.2256(9)    |
| Cg(1)-Cg(1) | b      | 5.0811(13) | 9.06(11)  | 49.3     | 49.4      | 3.3044(9)    | 3.3122(9)    |

a: 1-X, -1/2+Y, 1/2-Z; b: 3/2-X, -1/2+Y, Z.

**Table S12.** Theoretical and experimental results of elemental analysis for **I** and **II**.

| Weight (%) | <b>I</b> |        | <b>II</b> |        |
|------------|----------|--------|-----------|--------|
|            | (Exp.)   | (Cal.) | (Exp.)    | (Cal.) |
| C          | 32.54    | 32.71  | 30.57     | 32.43  |
| H          | 3.98     | 4.09   | 3.59      | 4.05   |
| N          | 12.43    | 12.72  | 6.53      | 6.31   |
| Ratio      |          |        |           |        |
| C          | 5.97     | 6      | 5.61      | 6      |
| H          | 8.76     | 9      | 7.90      | 8      |
| N          | 1.95     | 2      | 0.99      | 1      |

**Table S13.** The assignments of the infrared absorption peaks for **I** and **II**.

| Assignment (cm <sup>-1</sup> ) | <b>I</b>             | <b>II</b>            |
|--------------------------------|----------------------|----------------------|
| N-H                            | 3100, 612, 527       | 3131, 514            |
| O-H                            | 1376                 | 3070, 1336           |
| C=O                            | 1696                 | 1709                 |
| C=C                            | 1638, 1554           | 1632, 1465           |
| P-O                            | 1197, 1083, 958, 527 | 1198, 1055, 952, 514 |

**Table S14.** Birefringence comparison between title compounds and reported phosphates or sulfates containing organic groups

| Compounds                                                                                                                                         | Birefringence ( $\Delta n$ )  | Ref. <sup>c</sup> |
|---------------------------------------------------------------------------------------------------------------------------------------------------|-------------------------------|-------------------|
| <b>I</b>                                                                                                                                          | 0.196 @ 546 nm <sup>a</sup>   | This work         |
| <b>II</b>                                                                                                                                         | 0.284 @ 546 nm <sup>a</sup>   |                   |
| (C <sub>4</sub> H <sub>6</sub> N <sub>3</sub> ) <sup>+</sup> (H <sub>2</sub> PO <sub>3</sub> ) <sup>-</sup>                                       | 0.225 @ 589.3 nm <sup>a</sup> | 37                |
| [(C(NH <sub>2</sub> ) <sub>3</sub> ) <sub>3</sub> PO <sub>4</sub> ·2H <sub>2</sub> O                                                              | 0.055 @ 546 nm <sup>a</sup>   | 38                |
| [C(NH <sub>2</sub> ) <sub>3</sub> ] <sub>6</sub> (PO <sub>4</sub> )·3H <sub>2</sub> O                                                             | 0.078 @ 546 nm <sup>a</sup>   | 39                |
| [C(NH <sub>2</sub> ) <sub>3</sub> ]SbFPO <sub>4</sub> ·H <sub>2</sub> O                                                                           | 0.151 @ 546 nm <sup>a</sup>   | 64                |
| [C(NH <sub>2</sub> ) <sub>3</sub> ] <sub>2</sub> Sb <sub>3</sub> F <sub>3</sub> (HPO <sub>3</sub> ) <sub>4</sub>                                  | 0.027 @ 546 nm <sup>a</sup>   | 64                |
| NaIn(C <sub>2</sub> O <sub>4</sub> )(HPO <sub>4</sub> )(H <sub>2</sub> O) <sub>5</sub>                                                            | 0.098 @ 546 nm <sup>a</sup>   | 65                |
| ([Te(C <sub>6</sub> H <sub>5</sub> ) <sub>2</sub> ][PO <sub>3</sub> (OH)] <sub>n</sub>                                                            | 0.133 @ 550 nm <sup>a</sup>   | 66                |
| (C <sub>5</sub> H <sub>6</sub> ON) <sup>+</sup> (H <sub>2</sub> PO <sub>4</sub> ) <sup>-</sup>                                                    | 0.25 @ 1064 nm <sup>b</sup>   | 41                |
| (C <sub>3</sub> H <sub>7</sub> N <sub>6</sub> ) <sub>6</sub> (H <sub>2</sub> PO <sub>4</sub> ) <sub>4</sub> (HPO <sub>4</sub> )·4H <sub>2</sub> O | 0.220 @ 1064 nm <sup>b</sup>  | 40                |
| (N <sub>2</sub> H <sub>6</sub> )[HPO <sub>3</sub> F] <sub>2</sub>                                                                                 | 0.077 @ 1064 nm <sup>b</sup>  | 67                |
| [C(NH <sub>2</sub> ) <sub>3</sub> ] <sub>2</sub> PO <sub>3</sub> F                                                                                | 0.039 @ 532 nm <sup>b</sup>   | 60                |
| [C(NH <sub>2</sub> ) <sub>3</sub> ] <sub>2</sub> HPO <sub>4</sub> ·H <sub>2</sub> O                                                               | 0.014 @ 532 nm <sup>b</sup>   | 59                |
| [C <sub>5</sub> H <sub>6</sub> O <sub>2</sub> N <sub>3</sub> ][HSO <sub>4</sub> ] <sub>2</sub> ·H <sub>2</sub> O                                  | 0.25 @ 1064 nm <sup>b</sup>   | 68                |
| Te(CS(NH <sub>2</sub> ) <sub>2</sub> ) <sub>4</sub> SO <sub>4</sub> ·2H <sub>2</sub> O                                                            | 0.210 @ 546.1 nm <sup>a</sup> | 70                |
| (C <sub>3</sub> H <sub>7</sub> N <sub>6</sub> ) <sub>2</sub> SO <sub>4</sub> ·2H <sub>2</sub> O                                                   | 0.173 @ 1064 nm <sup>b</sup>  | 40                |
| C(NH <sub>2</sub> ) <sub>3</sub> SO <sub>3</sub> F                                                                                                | 0.133 @ 1064 nm <sup>b</sup>  | 69                |

a: experimental value; b: theoretical value; c: the references in the table refer to those in the main text.

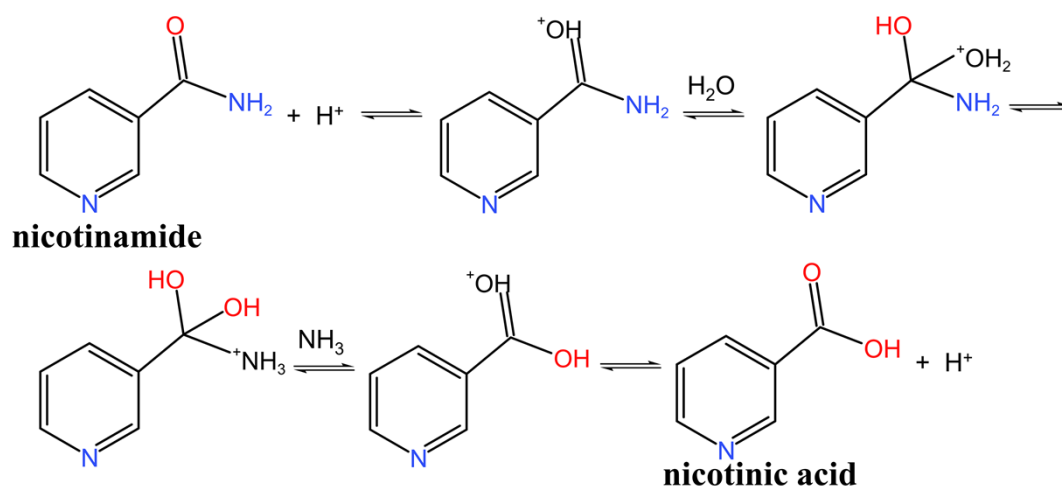

**Figure S1.** The reaction process from nicotinamide to nicotinic acid in acid solutions.

**Figure S2.** Simulated and measured powder X-ray diffraction patterns for I (a) and II (b).

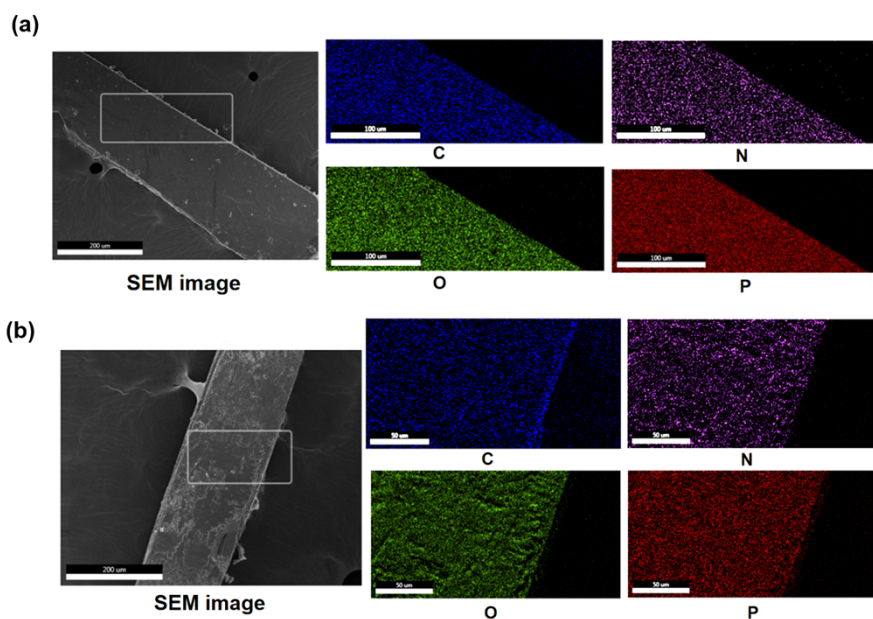

**Figure S3.** Sem images for I (a) and II (b).

**Figure S4.** IR spectra for **I** (a) and **II** (b).

**Figure S5.** TG and DTA for **I** (a) and **II** (b).

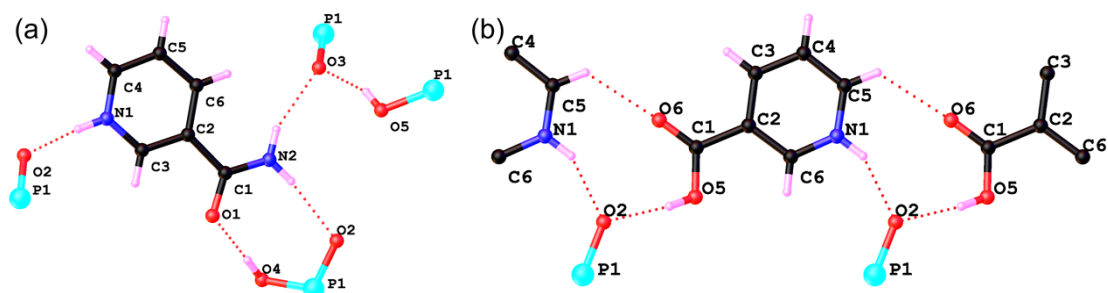

**Figure S6.** Hydrogen bonds around organic groups for **I** (a) and **II** (b).

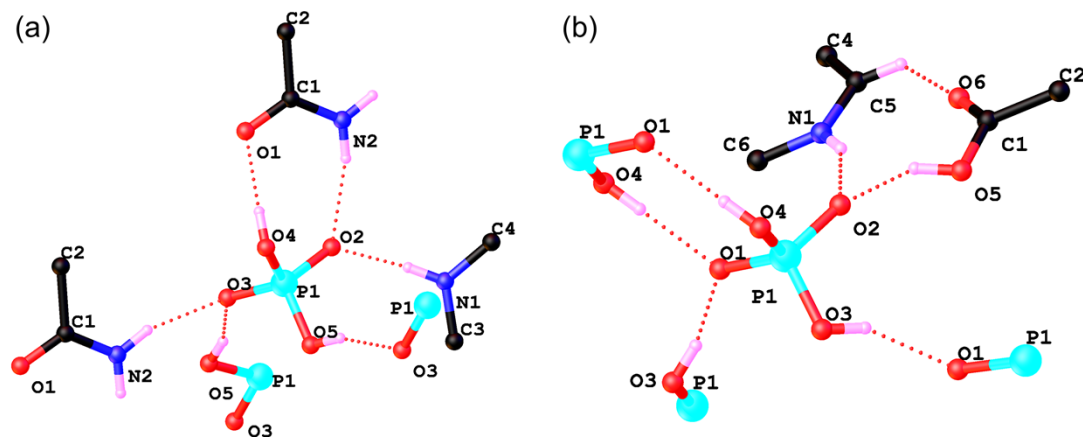

**Figure S7.** Hydrogen bonds around  $\text{H}_2\text{PO}_4^-$  group for **I** (a) and **II** (b).



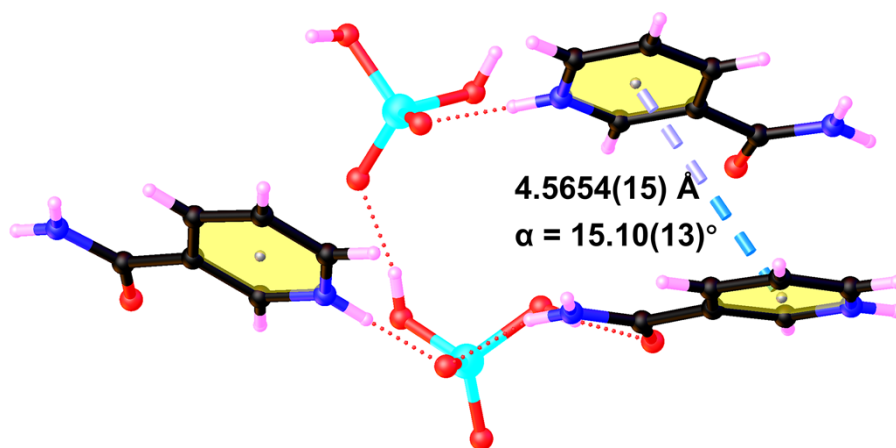

**Figure S8.** The  $\pi$ - $\pi$  and dipole-dipole interactions in **I**.

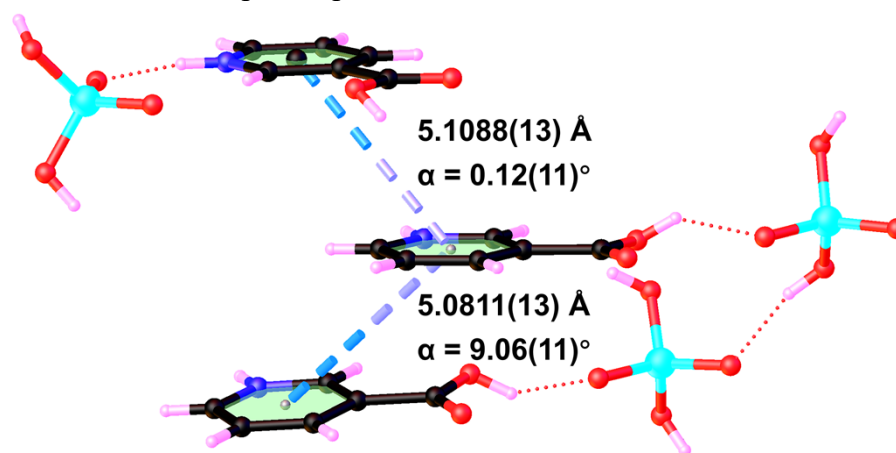

**Figure S9.** The  $\pi$ - $\pi$  and dipole-dipole interactions in **II**.

**Figure S10.** The calculated band structures of **I** (a) and **II** (b).

**Figure S11.** The thickness of **I** (a) and **II** (b) crystals used for birefringence measurements.

**Figure S12.** The wavelength-dependent refractive index of **I** (a) and **II** (b).

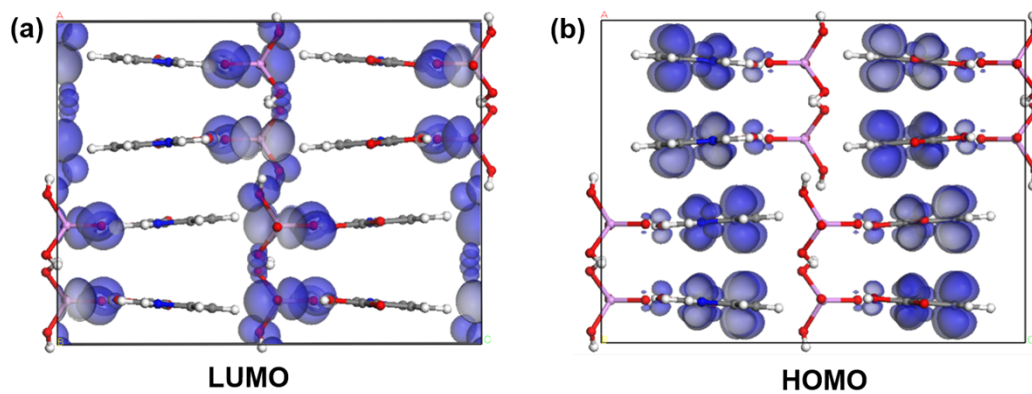

**Figure S13.** The LUMO and HOMO images of **II**.
